# Supplementary figures and images for: Preventing and treating brain metastases with three first-line EGFR-tyrosine kinase inhibitors in patients with EGFR mutation-positive advanced non-small cell lung cancer
Source: PubMed Central journal article supplement — Ther Adv Med Oncol. 2018 Sep 25;10:1758835918797589. doi: 10.1177/1758835918797589 (PMC6156208; doi:10.1177/1758835918797589), 2018-09-25

Gefitinib 2016.02.24

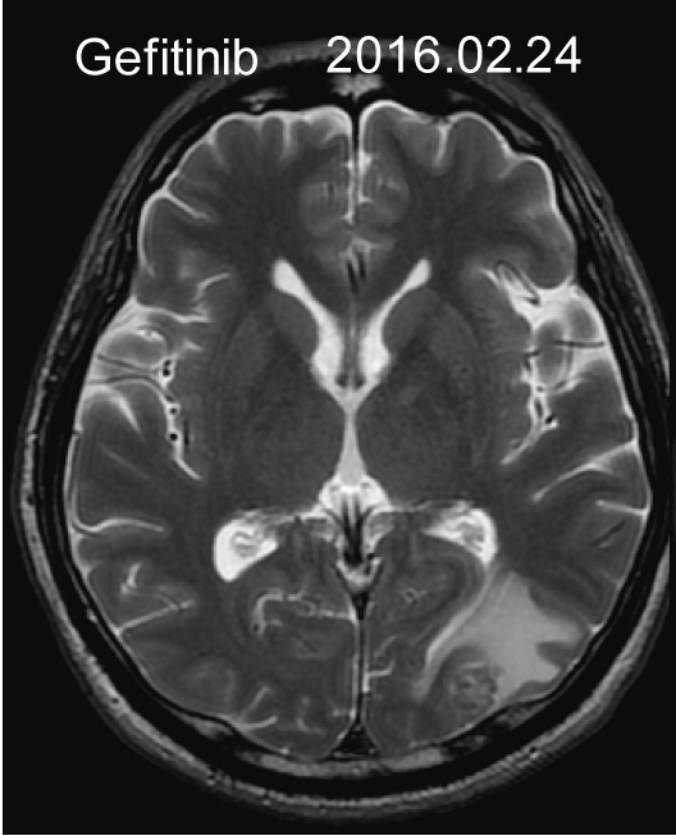

2016.05.20

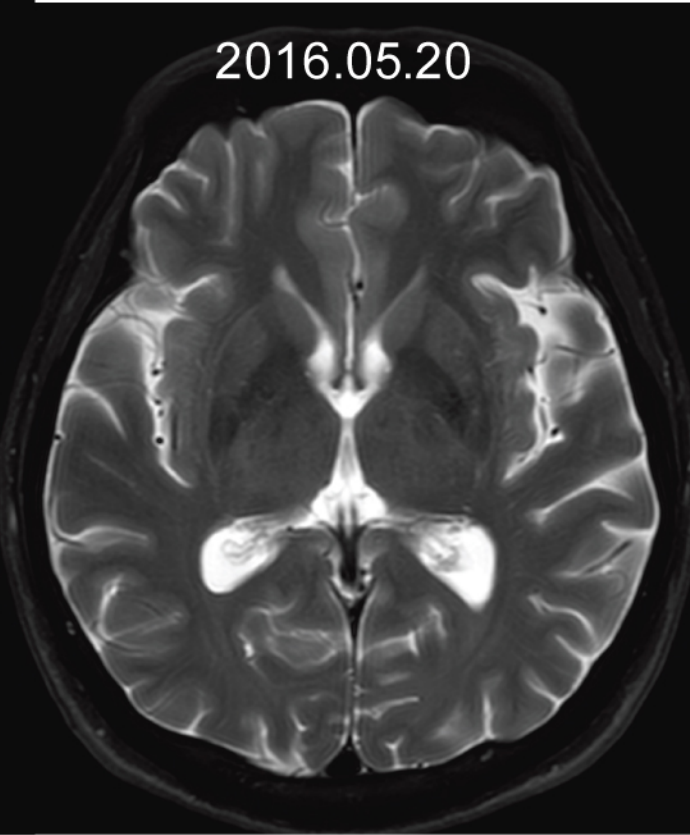

Erlotinib 2014.01.01

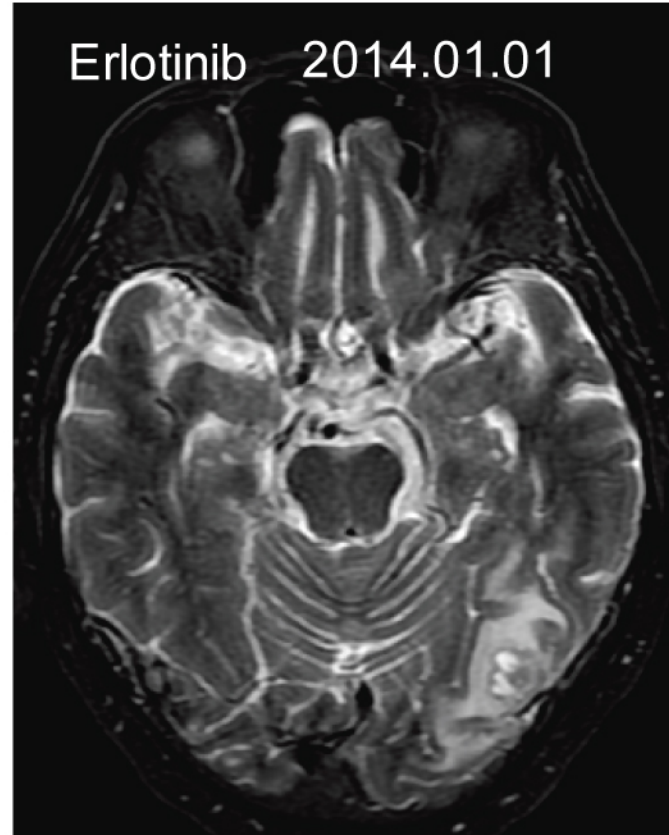

2014.04.28

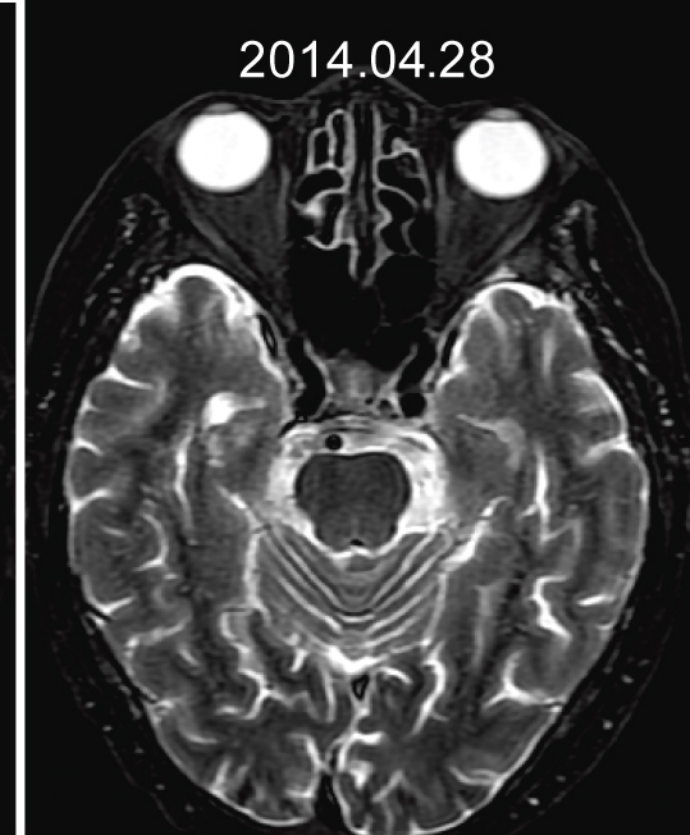

Afatinib 2014.08.29

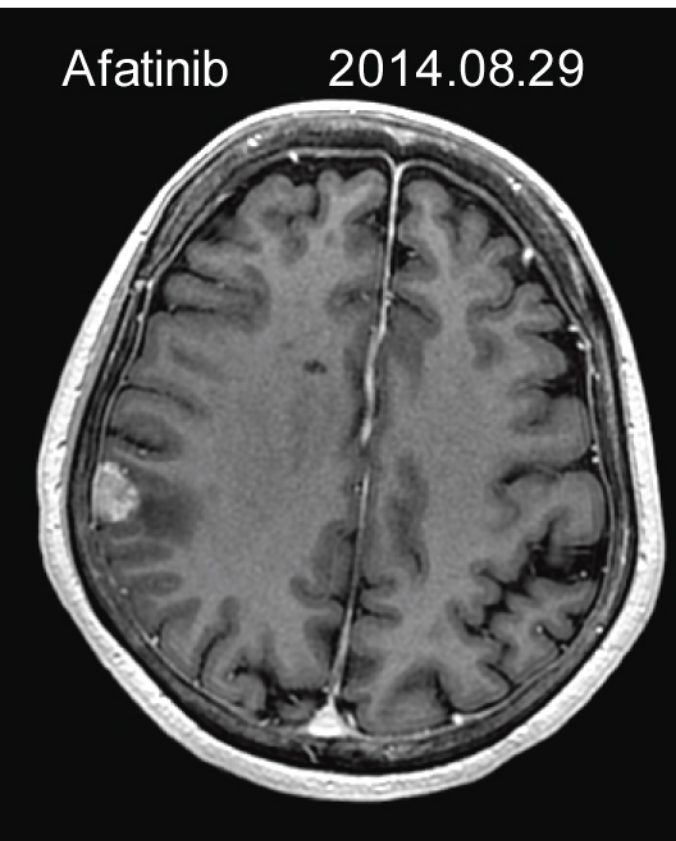

2015.02.23

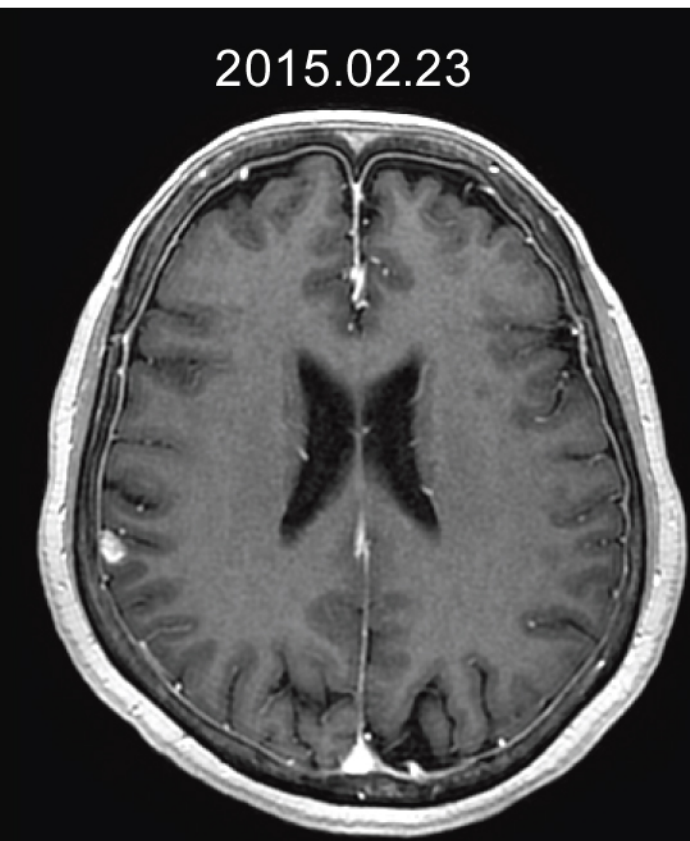

Supplement: Supp_Figure_1.pdf [file Supp_Figure_1.pdf]
